# Supplementary material
Source: PubMed Central journal article supplement (PMC6125168)
Supplement: NIHMS1500294-supplement-1.pdf [file NIHMS1500294-supplement-1.pdf]

## Supplementary Information

### The Cytochrome P450 Slow Metabolizers CYP2C9\*2 and CYP2C9\*3 Directly Regulate Tumorigenesis via Reduced Epoxyeicosatrienoic Acid Production

Lindsay N. Sausville, Mahesha Gangadhariah, Manuel Chiusa, Shaojun Mei, Shouzu Wei, Roy Zent, James M. Luther, Megan M. Shuey, Jorge H Capdevila, John R Falck, F Peter Guengerich, Scott M Williams, Ambra Pozzi

| gene                | forward                                     | reverse                                     | PCR conditions                                                                                                                        |
|---------------------|---------------------------------------------|---------------------------------------------|---------------------------------------------------------------------------------------------------------------------------------------|
| CYP2C9*2<br>(R144C) | 5'-GAGGAGCATTGAGGACTGT<br>GTTCAAGAGGAAGC-3' | 5'-GCTTCCTCTTGAACACAGT<br>CCTCAATGCTCCTC-3' | 95 °C x 60 seconds, 1 cycle;<br>95 °C x 60 seconds; 60 °C x 60 seconds;<br>68 °C x 10 min, 18 cycles;<br>72 °C x 10 seconds, 1 cycle. |
| CYP2C9*3<br>(I359L) | 5'-CGAGGTCCAGAGATACCTT<br>GACCTTCTCCCCAC-3' | 5'-GTGGGGAGAAGGTCAAGGT<br>ATCTCTGGACCTCG-3' | 95 °C x 60 seconds, 1 cycle;<br>95 °C x 60 seconds; 60 °C x 60 seconds;<br>68 °C x 10 min, 18 cycles;<br>72 °C x 10 seconds, 1 cycle. |

#### Supplementary Table S1

Generation of CYP2C9\* variants cDNAs. Sequence of primers and PCR conditions used to generate CYP2C9\*2 (R144C) and CYP2C9\*3 (I359L) cDNAs.

| <b>SNP</b>        | <b>Chr</b> | <b>Location</b> | <b>Genic Location</b> | <b>Major/Minor Allele</b> | <b>MAF</b> |
|-------------------|------------|-----------------|-----------------------|---------------------------|------------|
| rs7085745         | 10         | 96682514        | Upstream              | T/C                       | 0.207      |
| rs4918758         | 10         | 96697252        | Upstream              | T/C                       | 0.353      |
| rs2253635         | 10         | 96700537        | Intron                | A/G                       | 0.411      |
| rs12772884        | 10         | 96700630        | Intron                | T/A                       | 0.440      |
| rs1799853 (2C9*2) | 10         | 96702047        | Missense              | C/T                       | 0.116      |
| rs9332172         | 10         | 96731788        | Intron                | A/G                       | 0.178      |
| rs1057910 (2C9*3) | 10         | 96741053        | Missense              | A/C                       | 0.063      |
| rs1934967         | 10         | 96741426        | Intron                | C/T                       | 0.230      |
| rs11188130        | 10         | 96767767        | Downstream            | A/C                       | 0.268      |
| rs1934975         | 10         | 96769769        | Downstream            | T/C                       | 0.322      |
| rs11188133        | 10         | 96772015        | Downstream            | A/G                       | 0.415      |

### **Supplementary Table S2**

SNPs genotyped in the BioVU NSCLC study. For each SNP in the table the location is indicated by the chromosome and base pair position according to GRCh37.p13.

Chr, Chromosome; MAF, Minor allele frequency

| SNP                      | % Missing | Genotype Counts |     |    | HWE<br>p-value |
|--------------------------|-----------|-----------------|-----|----|----------------|
|                          |           | 0               | 1   | 2  |                |
| <i>rs7085745</i>         | 0         | 248             | 135 | 15 | 0.647          |
| <i>rs4918758</i>         | 0         | 162             | 191 | 45 | 0.380          |
| <i>rs2253635</i>         | 0         | 132             | 205 | 61 | 0.216          |
| <i>rs12772884</i>        | 0         | 116             | 214 | 68 | 0.084          |
| <i>rs1799853 (2C9*2)</i> | 0         | 312             | 80  | 6  | 0.631          |
| <i>rs9332172</i>         | 0.252     | 269             | 115 | 13 | 0.864          |
| <i>rs1057910 (2C9*3)</i> | 0.252     | 347             | 50  | 0  | 0.387          |
| <i>rs1934967</i>         | 0         | 230             | 153 | 15 | 0.118          |
| <i>rs11188130</i>        | 0         | 208             | 167 | 23 | 0.200          |
| <i>rs1934975</i>         | 0         | 187             | 16  | 45 | 0.421          |
| <i>rs11188133</i>        | 0         | 135             | 196 | 67 | 0.837          |

### Supplementary Table S3

Quality control measures of SNPs in the BioVU NSCLC study. From the population (n =398) the following was determined for each SNP genotyped: percent missing, genotype counts, and Hardy-Weinberg (HWE) p-values.

**A**

| Characteristic                             | N     | (%)     |
|--------------------------------------------|-------|---------|
| <b>Gender</b>                              |       |         |
| Male                                       | 224   | (61.31) |
| Female                                     | 174   | (43.72) |
| <b>Vital Status</b>                        |       |         |
| Died                                       | 114   | (28.64) |
| Alive                                      | 46    | (11.56) |
| Censored                                   | 238   | (59.80) |
| <b>Mean age at diagnosis, years (s.d.)</b> | 65.75 | (9.73)  |
| <b>Mean BMI (s.d.)</b>                     | 26.44 | (6.22)  |
| <b>NSCLC stage</b>                         |       |         |
| Localized                                  | 142   | (35.93) |
| Regional                                   | 148   | (37.19) |
| Distant                                    | 108   | (27.14) |
| <b>NSCLC Histology</b>                     |       |         |
| Adenocarcinoma                             | 244   | (61.31) |
| Squamous cell carcinoma                    | 167   | (41.96) |
| <b>Surgical resection</b>                  |       |         |
| Absent                                     | 231   | (58.04) |
| Present                                    | 167   | (41.96) |
| <b>Chemotherapy</b>                        |       |         |
| Absent                                     | 200   | (50.25) |
| Present                                    | 197   | (49.50) |
| <b>Radiation</b>                           |       |         |
| Absent                                     | 205   | (51.51) |
| Present                                    | 193   | (48.49) |

**B**

| Treatment(s)                                         | N   | (%)     |
|------------------------------------------------------|-----|---------|
| <b>No treatment</b>                                  | 28  | (7.04)  |
| <b>Surgical resection</b>                            | 117 | (29.40) |
| <b>Chemotherapy</b>                                  | 17  | (4.27)  |
| <b>Radiation</b>                                     | 29  | (7.29)  |
| <b>Surgical resection + chemotherapy</b>             | 30  | (7.54)  |
| <b>Surgical resection + radiation</b>                | 23  | (5.78)  |
| <b>Chemotherapy + radiation</b>                      | 93  | (23.37) |
| <b>Surgical resection + chemotherapy + radiation</b> | 60  | (15.08) |
| <b>One or more treatment variable(s) missing</b>     |     | (0.25)  |

#### Supplementary Table S4

Clinical and demographic description of NSCLC cases. **A**, Clinical and demographic variable distribution in the NSCLC cases included for survival analyses. Only NSCLC cases with stage data available were included. As adenocarcinoma and squamous cell carcinoma contain the majority of NSCLC cases, no other histology was reported in this study. Additionally, overlap was permitted for histology. One individual was missing chemotherapy treatment information, but otherwise information was complete for all individuals unless otherwise noted. **B**, Distribution of combinations of treatments.

**A**

| Characteristic                | Reference             | HR    | 95% CI      | p-value |
|-------------------------------|-----------------------|-------|-------------|---------|
| Sex                           | Male                  | 0.503 | 0.337-0.752 | 0.001   |
| Age at diagnosis <sup>1</sup> | NA                    | 0.999 | 0.980-1.018 | 0.915   |
| BMI <sup>1</sup>              | NA                    | 1.012 | 0.983-1.041 | 0.414   |
| NSCLC stage                   |                       |       |             |         |
| Local                         | Regional or distant   | 0.153 | 0.086-0.273 | <0.001  |
| Regional                      | Local or distant      | 1.425 | 0.987-2.058 | 0.058   |
| Distant                       | Local or regional     | 4.014 | 2.724-5.914 | <0.001  |
| NSCLC histology               |                       |       |             |         |
| Adenocarcinoma                | Not adenocarcinoma    | 1.725 | 1.135-2.622 | 0.010   |
| Squamous cell carcinoma       | Not squamous cell     | 0.539 | 0.360-0.807 | 0.002   |
| Surgical Resection            | No surgical resection | 0.227 | 0.154-0.335 | <0.001  |
| Chemotherapy                  | No chemotherapy       | 1.564 | 1.056-2.315 | 0.024   |
| Radiation                     | No radiation          | 1.970 | 1.314-2.954 | 0.002   |

**B**

| Characteristic          | Reference             | HR    | 95% CI      | p-value |
|-------------------------|-----------------------|-------|-------------|---------|
| Sex                     | Male                  | 0.443 | 0.291-0.674 | <0.001  |
| NSCLC stage             |                       |       |             |         |
| Local                   | Regional or distant   | 0.145 | 0.070-0.298 | <0.001  |
| Distant                 | Local or regional     | 1.513 | 0.968-2.365 | 0.069   |
| NSCLC histology         |                       |       |             |         |
| Adenocarcinoma          | Not adenocarcinoma    | 1.147 | 0.400-3.285 | 0.799   |
| Squamous cell carcinoma | Not squamous cell     | 0.696 | 0.251-1.926 | 0.485   |
| Surgical Resection      | No surgical resection | 0.410 | 0.256-0.649 | <0.001  |
| Chemotherapy            | No chemotherapy       | 0.382 | 0.233-0.626 | <0.001  |
| Radiation               | No radiation          | 1.112 | 0.693-1.783 | 0.660   |

**Supplementary Table S5**

**A**, The association of clinical and demographic variables with survival was examined with the Kaplan-Meier estimator. Hazard ratios (HR) and 95% confidence intervals (95% CI) were determined with a Cox proportional model to show the direction of effect. **B**, The Cox proportional hazard test was used to determine the hazard ratio, 95% confidence interval, and p-value in an adjusted model including all variables that associated with survival as determined by the Kaplan-Meier estimator. This adjusted model was used to assess if a variable independently associated with survival, or if the association was driven by its association with another variable predicting survival.

<sup>1</sup>indicates a continuous variable where the association with survival, including the p-value, was tested using the Cox proportional model.

NSCLC, non-small cell lung cancer; BMI, body mass index.

| <b>SNP</b>                   | <b>KM p-value</b> |
|------------------------------|-------------------|
| <i>rs7085745</i>             | 0.646             |
| <i>rs4918758</i>             | 0.396             |
| <i>rs2253635</i>             | 0.889             |
| <i>rs12772884</i>            | 0.906             |
| <i>rs1799853 (2C9*2)</i>     | 0.118             |
| <i>rs9332172</i>             | 0.141             |
| <i>rs1057910 (2C9*3)</i>     | 0.086             |
| <i>rs1934967</i>             | 0.835             |
| <i>rs11188130</i>            | 0.391             |
| <i>rs1934975</i>             | 0.835             |
| <i>rs11188133</i>            | 0.826             |
| <i>Collapsed 2C9*2 or *3</i> | 0.015             |

### **Supplementary Table S6**

Description of genotypes in the NSCLC cases. Initial association of *CYP2C9* SNPs assessed by the Kaplan-Meier estimator.

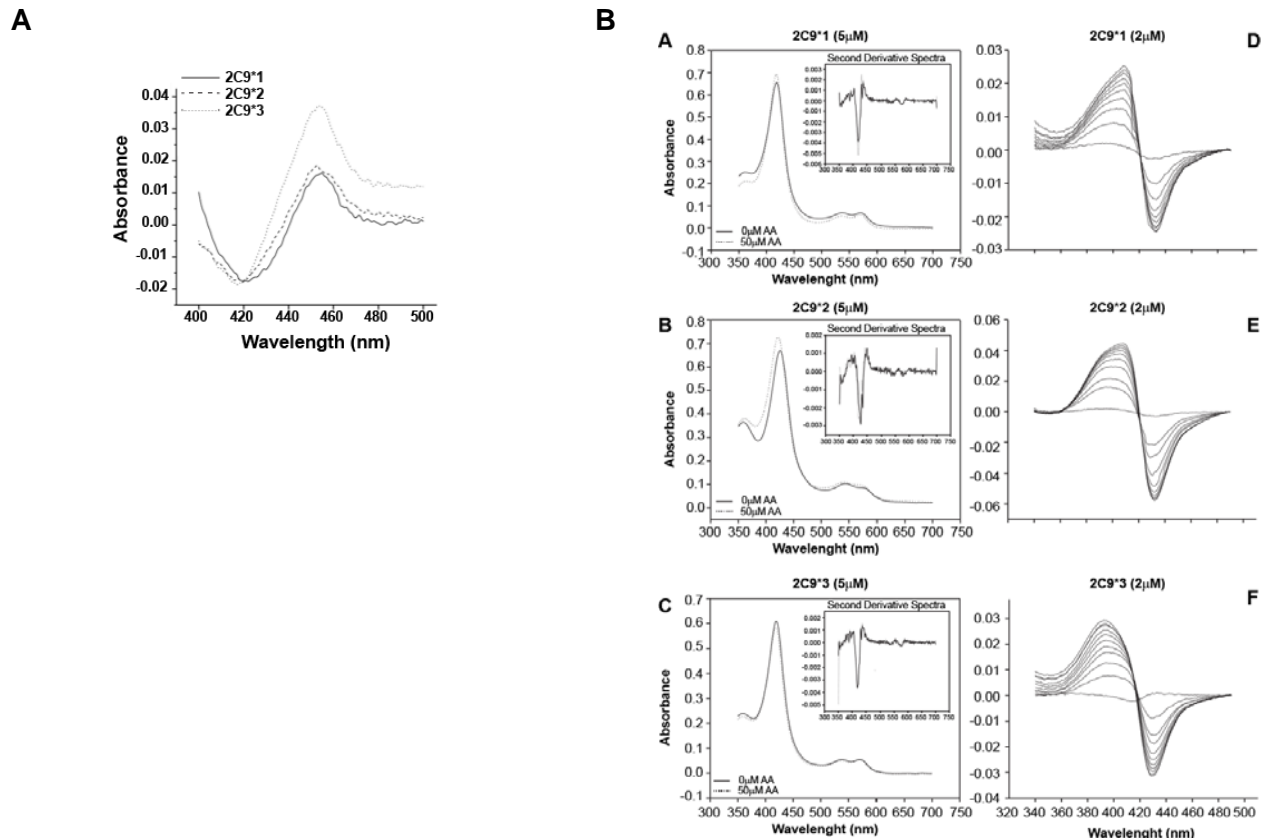

### Supplementary Figure S1

**A**, Ferrous-carbon monoxide vs. ferrous difference spectra of CYP2C9\* variants. Reduction to ferrous iron was achieved by the addition of  $\text{Na}_2\text{S}_2\text{O}_4$  as described by Omura and Sato (17). The concentrations of CYP2C9\*1, CYP2C9\*2, and CYP2C9\*3 were 0.16, 0.16, and 0.24  $\mu\text{M}$ , respectively. **B**, Spectral analysis of effects of arachidonic acid on CYP2C9\* variants. **A-C**, Absolute spectra of CYP2C9\* variants with or without a saturating concentration of AA (50  $\mu\text{M}$ ). The second derivative spectra ( $d^2A/d\lambda^2$ ) are shown in the insets. **D-F**, Titrations of CYP2C9\* variants (2.0  $\mu\text{M}$ ) with AA (0-100  $\mu\text{M}$ ). Two cuvettes containing CYP2C9\* proteins were balanced to obtain a baseline, which was recorded. Increasing concentrations of AA (in ethanol) were added to the sample cuvette, and at each point an equivalent volume of the solvent was added to the reference cuvette. The spectrum was recorded following each set of additions, and the data absorbance spectral maxima (390 nm) and minima (420 nm) were plotted vs. AA concentration and fit to hyperbolic plots, used to calculate  $K_d$  values. The  $K_d$  values calculated in parts D-F were  $5.7 \pm 0.3 \mu\text{M}$ ,  $5.3 \pm 0.4 \mu\text{M}$ , and  $9.1 \pm 0.5 \mu\text{M}$ , for CYP2C9\*1, CYP2C9\*2, and CYP2C9\*3, respectively.

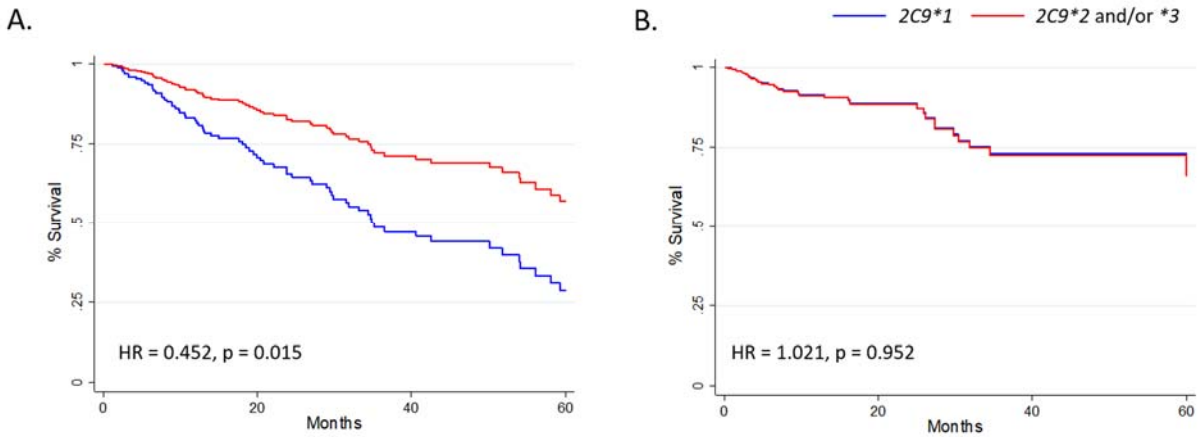

### Supplementary Figure S2

*CYP2C9\*2/\*3* associates with improved survival in NSCLC receiving platinum chemotherapy. Five-year survival curves are shown for subjects receiving (A) and not receiving (B) platinum chemotherapy. Stratified analysis, on the basis of receiving platinum-based chemotherapy, were conducted with Cox proportional hazard models to assess the association of hypomorphic *CYP2C9* alleles with NSCLC survival adjusted for NSCLC stage, resection, non-platinum chemotherapy, and sex in NSCLC subjects. Within subjects receiving platinum chemotherapy, 54 individuals were available with either *CYP2C9\*2* or *CYP2C9\*3*, while a total of 73 individuals with either allele were available in subjects not receiving platinum chemotherapy.
